# Supplementary material for: Admissions to paediatric medical wards with a primary mental health diagnosis: a systematic review of the literature
Source: PubMed Central journal article supplement (PMC11347246; doi:10.1136/archdischild-2023-326593), 2024-02-19
Supplement: archdischild-2023-326593supp002.pdf [file archdischild-2023-326593supp002.pdf]

## Appendix 2 Search strategy

From: 'Admissions to paediatric medical wards with a primary mental health diagnosis: a systematic review of the literature'

### Search strategy

Search strategies (developed in conjunction with a clinical librarian) were tailored for each database. In summary, searches consisted of search terms combining three overall domains: (admissions) AND (paediatric or children's wards) AND (mental health diagnosis/problem).

Specific search terms were as follows: (admission\* OR admitted OR admittance OR hospitalized OR hospitalised OR treated OR inpatient\* OR in patient\*) and (paediatric ward\* OR children\* ward\* OR pediatric ward\*) and (mental health\* OR psychiatric or psychological).

### PubMed

("admission"[All Fields] OR ("admit"[All Fields] OR "admits"[All Fields] OR "admitted"[All Fields] OR "admitting"[All Fields]) OR ("admittance"[All Fields] OR "admittances"[All Fields]) OR ("hospital s"[All Fields] OR "hospitalisation"[All Fields] OR "hospitalization"[MeSH Terms] OR "hospitalization"[All Fields] OR "hospitalised"[All Fields] OR "hospitalising"[All Fields] OR "hospitality"[All Fields] OR "hospitalisations"[All Fields] OR "hospitalizations"[All Fields] OR "hospitalize"[All Fields] OR "hospitalized"[All Fields] OR "hospitalizing"[All Fields] OR "hospitals"[MeSH Terms] OR "hospitals"[All Fields] OR "hospital"[All Fields]) OR ("therapy"[MeSH Subheading] OR "therapy"[All Fields] OR "treat"[All Fields] OR "treating"[All Fields] OR "treated"[All Fields] OR "treats"[All Fields])) AND ("paediatric wards"[All Fields] OR "children's wards"[All Fields] OR "pediatric wards"[All Fields]) AND ("children"[All Fields] OR "young"[All Fields] OR "adolescents"[All Fields] OR "children and young people"[All Fields] OR "children and adolescents"[All Fields]) AND ("mental health"[Author] OR "mental health diagnosis"[All Fields] OR "mental health problem"[All Fields] OR "mental health disorders"[All Fields] OR "mental health illness"[All Fields])) AND (1990/1/1:2023/4/24[pdat]).

### Web of Science

ALL= ((admission\* OR admitted OR admittance OR hospitalized OR treated) AND ("paediatric wards" OR "children's wards" OR "pediatric wards")) AND (children\* OR young\* OR adolescents\* OR "children and young people" OR "children and adolescents") AND (mental health\* OR "mental health diagnosis" OR "mental health problem" OR "mental health disorders" OR "mental health illness"). Index data 1990-01-01 to 2023-04-24.

### Embase

((admission\* or admitted or admittance or hospitalized or hospitalised or treated or inpatient\* or in patient\*) and (paediatric ward\* or children\* ward\* or pediatric ward\*) and (mental health\* or psychiatric or psychological)).mp. [mp=title, abstract, heading word, original title, keyword heading word, floating subheading word]. Limit to (full text and latest update and human and cochrane library and no language specified and yr="1990 - 2023").

### PsycINFO

((admission\* or admitted or admittance or hospitalized or hospitalised or treated or inpatient\* or in patient\*) and (paediatric ward\* or children\* ward\* or pediatric ward\*) and (mental health\* or psychiatric or psychological)).mp. [mp=title, abstract, heading word, table of contents, key concepts, original title, tests & measures, mesh word]. Limit to (full text and apa psycarticles journals and all journals and latest update and human and yr="1990 - 2023" and open access).

### Google Scholar

(admissions) AND (paediatric OR pediatric wards) AND (mental health).
