# Supplementary material for: Admissions to paediatric medical wards with a primary mental health diagnosis: a systematic review of the literature
Source: PubMed Central journal article supplement (PMC11347246; doi:10.1136/archdischild-2023-326593), 2024-02-19
Supplement: archdischild-2023-326593supp003.pdf [file archdischild-2023-326593supp003.pdf]

Table S1. CASP Qualitative Studies Checklist\*

| # | Authors                | Criteria for qualitative studies |   |   |   |   |   |   |   |   |    | Assessment |
|---|------------------------|----------------------------------|---|---|---|---|---|---|---|---|----|------------|
|   |                        | 1                                | 2 | 3 | 4 | 5 | 6 | 7 | 8 | 9 | 10 |            |
| 1 | Chang et al (2023)     | Y                                | Y | Y | Y | Y | C | Y | Y | Y | Y  | High       |
| 2 | Wu and Chen (2021)     | Y                                | Y | Y | Y | Y | C | Y | Y | Y | Y  | High       |
| 3 | Worsley (2019)         | Y                                | Y | N | Y | Y | N | C | Y | Y | Y  | High       |
| 4 | Hampton et al (2015)   | Y                                | Y | Y | Y | Y | Y | Y | Y | Y | Y  | High       |
| 5 | Ramjan and Gil (2012)  | Y                                | Y | C | Y | Y | N | Y | C | Y | C  | Moderate   |
| 6 | Happell et al (2009)   | Y                                | Y | Y | Y | Y | C | Y | N | Y | Y  | High       |
| 7 | Watson (2006)          | Y                                | Y | N | N | Y | N | N | C | Y | C  | Low        |
| 8 | Anderson et al (2003)  | Y                                | Y | Y | C | Y | N | C | Y | Y | Y  | High       |
| 9 | King and Turner (2000) | Y                                | Y | Y | C | Y | N | Y | C | Y | C  | Moderate   |

\*CASP criteria for qualitative studies: 1. Was there a clear statement of the aims of the research?; 2. Was a qualitative methodology appropriate?; 3. Was the research design appropriate to address the aims of the research?; 4. Was the recruitment strategy appropriate to the aims of the research?; 5. Was the data collected in a way that addressed the research issue?; 6. Has the relationship between researcher and participants been adequately considered?; 7. Have ethical issues been considered?; 8. Was the data analysis sufficiently rigorous?; 9. Is there a clear statement of the findings?; 10. How valuable is the research? (Y: Yes, N: No, C: Can't tell)

Table S2. AXIS scale for cross-sectional studies\*

|              |                                                                                                                                                       | Kölich et al (2023) | Ibezako et al (2022) | Duarte and Zelaya (2019) | Plemmons et al (2018) | Wallis (2018) | Gallagher et al (2017) | Santillanes et al (2017) | Claudius et al (2014) | Case et al (2007) | Levine et al (2005) | Smith et al (2014) | Mansbach et al (2003) | Ramritu et al (2002) | Valdivia et al (2001) | Gasquet and Choquet (1994) |
|--------------|-------------------------------------------------------------------------------------------------------------------------------------------------------|---------------------|----------------------|--------------------------|-----------------------|---------------|------------------------|--------------------------|-----------------------|-------------------|---------------------|--------------------|-----------------------|----------------------|-----------------------|----------------------------|
| Introduction | Were the aims/objectives of the study clear?                                                                                                          | Y                   | Y                    | Y                        | Y                     | Y             | Y                      | Y                        | Y                     | Y                 | Y                   | Y                  | Y                     | Y                    | Y                     | Y                          |
|              | Was the study design appropriate for the stated aim(s)?                                                                                               | Y                   | Y                    | Y                        | Y                     | Y             | Y                      | Y                        | Y                     | Y                 | Y                   | Y                  | Y                     | Y                    | Y                     | Y                          |
| Methods      | Was the sample size justified?                                                                                                                        | N                   | N                    | Y                        | Y                     | N             | N                      | N                        | N                     | Y                 | Y                   | N                  | N                     | N                    | N                     | N                          |
|              | Was the target/reference population clearly defined? (Is it clear who the research was about?)                                                        | N                   | Y                    | Y                        | Y                     | Y             | Y                      | Y                        | Y                     | Y                 | Y                   | Y                  | Y                     | Y                    | Y                     | Y                          |
|              | Was the sample frame taken from an appropriate population base so that it closely represented the target/reference population under investigation?    | Y                   | Y                    | Y                        | Y                     | Y             | Y                      | Y                        | Y                     | Y                 | Y                   | Y                  | Y                     | Y                    | Y                     | Y                          |
|              | Was the selection process likely to select subjects/participants that were representative of the target/reference population under investigation?     | Y                   | Y                    | Y                        | Y                     | Y             | Y                      | Y                        | Y                     | Y                 | Y                   | Y                  | Y                     | Y                    | Y                     | Y                          |
|              | Were measures undertaken to address and categorize non-responders?                                                                                    | N                   | N                    | N                        | N                     | N             | N                      | N                        | N                     | N                 | N                   | N                  | Y                     | N                    | N                     | N                          |
|              | Were the risk factor and outcome variables measured appropriate to the aims of the study?                                                             | Y                   | Y                    | Y                        | Y                     | Y             | Y                      | Y                        | Y                     | Y                 | Y                   | Y                  | Y                     | Y                    | Y                     | Y                          |
|              | Were the risk factor and outcome variables measured correctly using instruments/measurements that had been trialled, piloted or published previously? | Y                   | Y                    | Y                        | Y                     | Y             | Y                      | Y                        | Y                     | Y                 | Y                   | Y                  | Y                     | Y                    | Y                     | Y                          |
|              | Is it clear what was used to determine statistical significance and/or precision estimates? (e.g., p values, CIs)                                     | Y                   | Y                    | NA                       | Y                     | N             | N                      | Y                        | N                     | Y                 | Y                   | N                  | Y                     | NA                   | NA                    | N                          |
|              | Were the methods (including statistical methods) sufficiently described to enable them to be repeated?                                                | Y                   | Y                    | Y                        | Y                     | N             | Y                      | Y                        | Y                     | Y                 | Y                   | N                  | N                     | N                    | N                     | Y                          |
|              | Were the basic data adequately described?                                                                                                             | Y                   | Y                    | Y                        | Y                     | Y             | Y                      | Y                        | Y                     | Y                 | Y                   | Y                  | Y                     | Y                    | Y                     | Y                          |
| Results      | Does the response rate raise concerns about non-response bias?                                                                                        | ND                  | ND                   | ND                       | ND                    | ND            | ND                     | ND                       | ND                    | ND                | ND                  | ND                 | N                     | ND                   | N                     | N                          |
|              | If appropriate, was information about non-responders described?                                                                                       | N                   | N                    | N                        | N                     | N             | N                      | N                        | N                     | N                 | N                   | N                  | Y                     | N                    | N                     | N                          |
|              | Were the results internally consistent?                                                                                                               | Y                   | Y                    | Y                        | Y                     | Y             | Y                      | Y                        | Y                     | Y                 | Y                   | Y                  | Y                     | Y                    | Y                     | Y                          |
|              | Were the results for the analyses described in the methods, presented?                                                                                | N                   | Y                    | Y                        | Y                     | N             | Y                      | Y                        | Y                     | Y                 | Y                   | Y                  | Y                     | Y                    | Y                     | Y                          |
| Discussion   | Were the authors' discussions and conclusions justified by the results?                                                                               | Y                   | Y                    | Y                        | Y                     | N             | Y                      | Y                        | Y                     | Y                 | Y                   | Y                  | Y                     | Y                    | Y                     | Y                          |
|              | Were the limitations of the study discussed?                                                                                                          | Y                   | Y                    | Y                        | Y                     | N             | Y                      | Y                        | Y                     | Y                 | Y                   | N                  | Y                     | N                    | N                     | N                          |
| Others       | Were there any funding sources or conflicts of interest that may affect the authors' interpretation of the results?                                   | NDis                | N                    | NDis                     | N                     | NDis          | N                      | N                        | N                     | NDis              | NDis                | NDis               | NDis                  | NDis                 | NDis                  | NDis                       |
|              | Was ethical approval or consent of participants attained?                                                                                             | NS                  | Y                    | Y                        | Y                     | NS            | Y                      | Y                        | Y                     | NS                | Y                   | Y                  | Y                     | Y                    | NS                    | NS                         |

\*The tool does not provide a numerical scale for assessing the quality of the study, it has areas to record assessment using "Yes", "No" or "Don't Know/comments" answer for each of the 20 questions.

Abbreviations: Y: Yes; N: No; DK: Don't know; Comments: not described (ND), not disclosed (NDis), not stated (NS), not applicable (NA)
